# Supplementary material
Source: ML conference proceedings conference paper supplement (https://openreview.net/forum?id=0nW7xnWnam)
Supplement: supplementary_material [file attachment]

## A Implementation Details

### A.1 Distance function

As mentioned in Section 3, we wish to learn an encoding such that our distance metric  $d$  is the euclidean distance between the encoded states.

$$d(s, s') = ||h(s) - h(s')||^2 \quad (5)$$

To learn the encoder  $h$ , we optimize a contrastive loss on encodings of the current and future states along the same trajectory. We use the InfoNCE Loss [30],

$$\mathcal{L}_q = \log \frac{\exp(q^T W k)}{\exp\left(\sum_{i=0}^K \exp(q^T W k_i)\right)} \quad (6)$$

with query  $q = h(s_t^i)$  as the encoded starting state, and the keys  $k = h(s_{t+H}^i)$  as the encoded future states along the  $K$  trajectories in the dataset  $\mathcal{D}$ .

### A.2 Training

The training for both skill extraction and fine-tuning were done on a single NVIDIA 2080Ti GPU. Skill extraction takes approximately 3-4 hours, and fine-tuning requires less than 10 minutes. We build upon the SPIRL codebase at <https://github.com/clvrai/spirl>. Hyperparameters used are listed in Table 6.

Table 6: Training Hyperparameters

| Hyperparameter                     | Value                                                           |
|------------------------------------|-----------------------------------------------------------------|
| <b>Contrastive Distance Metric</b> |                                                                 |
| Encoder output dim                 | 32                                                              |
| Encoder Hidden Layers              | 128                                                             |
| Encoder # Hidden Layers            | 2                                                               |
| Optimizer                          | Adam( $\beta_1 = 0.9, \beta_2 = 0.999, \text{LR}=1\text{e-}3$ ) |
| <b>Skill extraction</b>            |                                                                 |
| Epochs                             | 200                                                             |
| Batch size                         | 128                                                             |
| Optimizer                          | Adam( $\beta_1 = 0.9, \beta_2 = 0.999, \text{LR}=1\text{e-}3$ ) |
| $H$ (sub-trajectory length)        | 10                                                              |
| $\beta$                            | 5e-4 (Kitchen), 1e-2 (Maze)                                     |
| <b>Skill Encoder</b>               |                                                                 |
| dim- $\mathcal{Z}$ in VAE          | 128                                                             |
| hidden dim                         | 128                                                             |
| # LSTM Layers                      | 1                                                               |
| <b>Skill Decoder</b>               |                                                                 |
| hidden dim                         | 128                                                             |
| # hidden layers                    | 5                                                               |
| <b>Inverse Skill Dynamic Model</b> |                                                                 |
| hidden dim                         | 128                                                             |
| # hidden layers                    | 5                                                               |
| <b>Fine-tuning</b>                 |                                                                 |
| Epochs                             | 50                                                              |
| Batch size                         | 128                                                             |
| Optimizer                          | Adam( $\beta_1 = 0.9, \beta_2 = 0.999, \text{LR}=1\text{e-}3$ ) |

### 476 **A.3 Datasets**

477 The PointMaze and Kitchen environment datasets (both skill extraction datasets and few-shot learning  
478 datasets) are generated from an expert policy. For the AntMaze environment, the dataset was created  
479 from the D4RL dataset [29], licensed under the Creative Commons Attribution 4.0 License (CC BY).  
480 Datasets for each blocked section was created by filtering out any trajectories that passed through the  
481 blocked regions shown in Figure 3. Code for the dataset generation is included in the supplementary  
482 material.
